# Supplementary material for: Effect of Huanglongbing or Greening Disease on Orange Juice Quality, a Review
Source: PubMed Central journal article supplement (PMC6350258; doi:10.3389/fpls.2018.01976), 2019-01-22
Supplement: Table_1.pdf [file Table_1.pdf]

Table S. Worldwide distribution of Huanglongbing's bacteria and vectors

| Country                           | Bacteria    | Status                                                                                                                                                                                                                                                                                           | Vector                  | Status                                                                                                                                                                                                                                                                             |
|-----------------------------------|-------------|--------------------------------------------------------------------------------------------------------------------------------------------------------------------------------------------------------------------------------------------------------------------------------------------------|-------------------------|------------------------------------------------------------------------------------------------------------------------------------------------------------------------------------------------------------------------------------------------------------------------------------|
| <b>Asia</b>                       |             |                                                                                                                                                                                                                                                                                                  |                         |                                                                                                                                                                                                                                                                                    |
| Afghanistan                       | -           | -                                                                                                                                                                                                                                                                                                | <i>Diaphorina citri</i> | present                                                                                                                                                                                                                                                                            |
| Bangladesh                        | <i>CLas</i> | present                                                                                                                                                                                                                                                                                          | <i>Diaphorina citri</i> | present                                                                                                                                                                                                                                                                            |
| Bhutan                            | <i>CLas</i> | present                                                                                                                                                                                                                                                                                          | <i>Diaphorina citri</i> | present                                                                                                                                                                                                                                                                            |
| Cambodia                          | <i>CLas</i> | present                                                                                                                                                                                                                                                                                          | <i>Diaphorina citri</i> | present                                                                                                                                                                                                                                                                            |
| China                             | <i>CLas</i> | present (Fujian, Guangdong, Guangxi, Guizhou, Hainan, Hunan, Jiangxi, Schuan, Yunnan, Zhejiang); few occurrences (Xianggang - Hong Kong)                                                                                                                                                         | <i>Diaphorina citri</i> | present (Aomen, Fujian, Guangdong, Guizhou, Hainan, Henan, Hunan, Jiangxi, Sichuan, Yunnan, Zhejiang); widespread (Xianggang); restricted distribution (Guangxi)                                                                                                                   |
| East Timor                        | <i>CLas</i> | widespread                                                                                                                                                                                                                                                                                       | <i>Diaphorina citri</i> | present                                                                                                                                                                                                                                                                            |
| India                             | <i>CLas</i> | present (Andhra Pradesh, Arunachal Pradesh, Assam, Bihar, Delhi, Gujarat, Haryana, Himachal Pradesh, Jammu & Kashmir, Karnataka, Kerala, Madhya Pradesh, Maharashtra, Manipur, Meghalaya, Mizoram, Nagaland, Orissa, Punjab, Rajasthan, Sikkim, Tamil Nadu, Tripura, Uttar Pradesh, West Bengal) | <i>Diaphorina citri</i> | present (Andhra Pradesh, Arunachal Pradesh, Assam, Bihar, Delhi, Gujarat, Haryana, Himachal Pradesh, Jammu & Kashmir, Karnataka, Kerala, Lakshadweep, Madhya Pradesh, Maharashtra, Manipur, Meghalaya, Punjab, Rajasthan, Sikkim, Tamil Nadu, Tripura, Uttar Pradesh, West Bengal) |
| Indonesia                         | <i>CLas</i> | present (Irian Jaya, Java, Kalimantan, Sulawesi, Sumatra); widespread (Nusa Tenggara)                                                                                                                                                                                                            | <i>Diaphorina citri</i> | present (Java, Maluku, Nusa Tenggara, Sumatra);                                                                                                                                                                                                                                    |
| Iran                              | <i>CLas</i> | restricted distribution                                                                                                                                                                                                                                                                          | <i>Diaphorina citri</i> | restricted distribution                                                                                                                                                                                                                                                            |
| Japan                             | <i>CLas</i> | present (Ryukyu Archipelago); restricted distribution (Kyushu)                                                                                                                                                                                                                                   | <i>Diaphorina citri</i> | few occurrence (Kyushu); present (Ryukyu Archipelago)                                                                                                                                                                                                                              |
| Laos                              | <i>CLas</i> | present                                                                                                                                                                                                                                                                                          | <i>Diaphorina citri</i> | present                                                                                                                                                                                                                                                                            |
| Malaysia                          | <i>CLas</i> | present (Sarawak, West)                                                                                                                                                                                                                                                                          | <i>Diaphorina citri</i> | present (Sabah, West)                                                                                                                                                                                                                                                              |
| Maldives                          | -           | -                                                                                                                                                                                                                                                                                                | <i>Diaphorina citri</i> | present                                                                                                                                                                                                                                                                            |
| Myanmar                           | <i>CLas</i> | present                                                                                                                                                                                                                                                                                          | <i>Diaphorina citri</i> | present                                                                                                                                                                                                                                                                            |
| Nepal                             | <i>CLas</i> | widespread                                                                                                                                                                                                                                                                                       | <i>Diaphorina citri</i> | present                                                                                                                                                                                                                                                                            |
| Oman                              | -           | -                                                                                                                                                                                                                                                                                                | <i>Diaphorina citri</i> | restricted distribution                                                                                                                                                                                                                                                            |
| Pakistan                          | <i>CLas</i> | present                                                                                                                                                                                                                                                                                          | <i>Diaphorina citri</i> | widespread                                                                                                                                                                                                                                                                         |
| Philippines                       | <i>CLas</i> | widespread                                                                                                                                                                                                                                                                                       | <i>Diaphorina citri</i> | present                                                                                                                                                                                                                                                                            |
| Saudi Arabia                      | <i>CLaf</i> | present                                                                                                                                                                                                                                                                                          | <i>Trioza erytrae</i>   | restricted distribution                                                                                                                                                                                                                                                            |
|                                   |             |                                                                                                                                                                                                                                                                                                  | <i>Diaphorina citri</i> | present                                                                                                                                                                                                                                                                            |
| Sri Lanka                         | <i>CLas</i> | present                                                                                                                                                                                                                                                                                          | <i>Diaphorina citri</i> | present                                                                                                                                                                                                                                                                            |
| Taiwan                            | <i>CLas</i> | present widespread                                                                                                                                                                                                                                                                               | <i>Diaphorina citri</i> | restricted distribution                                                                                                                                                                                                                                                            |
| Thailand                          | <i>CLas</i> | present                                                                                                                                                                                                                                                                                          | <i>Diaphorina citri</i> | present                                                                                                                                                                                                                                                                            |
| United Arab Emirates              | -           | -                                                                                                                                                                                                                                                                                                | <i>Diaphorina citri</i> | present                                                                                                                                                                                                                                                                            |
| Vietnam                           | <i>CLas</i> | present restricted distribution                                                                                                                                                                                                                                                                  | <i>Diaphorina citri</i> | restricted distribution                                                                                                                                                                                                                                                            |
| Yemen                             | <i>CLaf</i> | present restricted distribution                                                                                                                                                                                                                                                                  | <i>Trioza erytrae</i>   | restricted distribution                                                                                                                                                                                                                                                            |
|                                   |             |                                                                                                                                                                                                                                                                                                  | <i>Diaphorina citri</i> | present                                                                                                                                                                                                                                                                            |
| <b>Africa</b>                     |             |                                                                                                                                                                                                                                                                                                  |                         |                                                                                                                                                                                                                                                                                    |
| Angola                            | -           | -                                                                                                                                                                                                                                                                                                | <i>Trioza erytrae</i>   | present                                                                                                                                                                                                                                                                            |
| Burundi                           | <i>CLaf</i> | present                                                                                                                                                                                                                                                                                          | -                       | -                                                                                                                                                                                                                                                                                  |
| Cameroon                          | <i>CLaf</i> | present                                                                                                                                                                                                                                                                                          | <i>Trioza erytrae</i>   | present                                                                                                                                                                                                                                                                            |
| Camoros                           | -           | -                                                                                                                                                                                                                                                                                                | <i>Trioza erytrae</i>   | present                                                                                                                                                                                                                                                                            |
| Congo, Democratic republic of the | -           | -                                                                                                                                                                                                                                                                                                | <i>Trioza erytrae</i>   | restricted distribution                                                                                                                                                                                                                                                            |
| Central African                   | <i>CLaf</i> | present                                                                                                                                                                                                                                                                                          | -                       | -                                                                                                                                                                                                                                                                                  |

| Country                | Bacteria                   | Status                                                                                                 | Vector                                            | Status                                                                                                                                                      |
|------------------------|----------------------------|--------------------------------------------------------------------------------------------------------|---------------------------------------------------|-------------------------------------------------------------------------------------------------------------------------------------------------------------|
| Republic Eritrea       | -                          | -                                                                                                      | <i>Trioza erytreae</i>                            | present                                                                                                                                                     |
| Ethiopia               | <i>CLaf</i><br><i>CLas</i> | present<br>present (few occurrences)                                                                   | <i>Trioza erytreae</i>                            | present                                                                                                                                                     |
| Kenya                  | <i>CLaf</i>                | present                                                                                                | <i>Trioza erytreae</i>                            | present                                                                                                                                                     |
| Madagascar             | <i>CLaf</i>                | present                                                                                                | <i>Trioza erytreae</i>                            | present                                                                                                                                                     |
| Malawi                 | <i>CLaf</i>                | present                                                                                                | <i>Trioza erytreae</i>                            | present                                                                                                                                                     |
| Mauritius              | <i>CLaf</i><br><i>CLas</i> | present<br>restricted distribution                                                                     | <i>Trioza erytreae</i><br><i>Diaphorina citri</i> | present<br>present                                                                                                                                          |
| Réunion                | <i>CLaf</i><br><i>CLas</i> | present<br>restricted distribution                                                                     | <i>Trioza erytreae</i><br><i>Diaphorina citri</i> | present<br>present                                                                                                                                          |
| Rwanda                 | <i>CLaf</i>                | present                                                                                                | <i>Trioza erytreae</i>                            | present                                                                                                                                                     |
| Saint Helena           | <i>CLaf</i>                | present (widespread)                                                                                   | <i>Trioza erytreae</i>                            | present                                                                                                                                                     |
| Sao Tome & Principe    | -                          | -                                                                                                      | <i>Trioza erytreae</i>                            | present                                                                                                                                                     |
| Somalia                | <i>CLaf</i>                | present                                                                                                | -                                                 | -                                                                                                                                                           |
| South Africa           | <i>CLaf</i>                | restricted distribution                                                                                | <i>Trioza erytreae</i>                            | widespread                                                                                                                                                  |
| Sudan                  | -                          | -                                                                                                      | <i>Trioza erytreae</i>                            | present                                                                                                                                                     |
| Swaziland              | <i>CLaf</i>                | present                                                                                                | <i>Trioza erytreae</i>                            | restricted distribution                                                                                                                                     |
| Tanzania               | <i>CLaf</i>                | restricted distribution                                                                                | <i>Trioza erytreae</i><br><i>Diaphorina citri</i> | restricted distribution<br>restricted distribution                                                                                                          |
| Uganda                 | -                          | -                                                                                                      | <i>Trioza erytreae</i>                            | present                                                                                                                                                     |
| Zambia                 | -                          | -                                                                                                      | <i>Trioza erytreae</i>                            | present                                                                                                                                                     |
| Zimbabwe               | <i>CLaf</i>                | restricted distribution                                                                                | <i>Trioza erytreae</i>                            | present                                                                                                                                                     |
| <b>North America</b>   |                            |                                                                                                        |                                                   |                                                                                                                                                             |
| Mexico                 | <i>CLas</i>                | restricted distribution                                                                                | <i>Diaphorina citri</i>                           | restricted distribution                                                                                                                                     |
| USA                    | <i>CLas</i>                | present, few occurrences (California, Georgia, Louisiana, South Carolina, Texas); widespread (Florida) | <i>Diaphorina citri</i>                           | present (Florida, Hawaii, Texas); few occurrences (Alabama, California, Georgia, Louisiana, Mississippi, South Carolina); restricted distribution (Arizona) |
| <b>Central America</b> |                            |                                                                                                        |                                                   |                                                                                                                                                             |
| Antigua and Barbuda    | -                          | -                                                                                                      | <i>Diaphorina citri</i>                           | present                                                                                                                                                     |
| Bahamas                | -                          | -                                                                                                      | <i>Diaphorina citri</i>                           | present                                                                                                                                                     |
| Barbados               | <i>CLas</i>                | restricted distribution                                                                                | <i>Diaphorina citri</i>                           | restricted distribution                                                                                                                                     |
| Belize                 | <i>CLas</i>                | restricted distribution                                                                                | <i>Diaphorina citri</i>                           | present                                                                                                                                                     |
| Cayman Islands         | -                          | -                                                                                                      | <i>Diaphorina citri</i>                           | present                                                                                                                                                     |
| Costa Rica             | <i>CLas</i>                | restricted distribution                                                                                | <i>Diaphorina citri</i>                           | present                                                                                                                                                     |
| Cuba                   | <i>CLas</i>                | present (widespread)                                                                                   | <i>Diaphorina citri</i>                           | present                                                                                                                                                     |
| Dominica               | <i>CLas</i>                | restricted distribution                                                                                | <i>Diaphorina citri</i>                           | present                                                                                                                                                     |
| Dominican Republic     | <i>CLas</i>                | restricted distribution                                                                                | <i>Diaphorina citri</i>                           | present                                                                                                                                                     |

| Country                      | Bacteria                   | Status                                                                                 | Vector                  | Status                                                                                        |
|------------------------------|----------------------------|----------------------------------------------------------------------------------------|-------------------------|-----------------------------------------------------------------------------------------------|
| Guadeloupe                   | <i>CLas</i>                | restricted distribution                                                                | <i>Diaphorina citri</i> | restricted distribution                                                                       |
| Haiti                        | -                          | -                                                                                      | <i>Diaphorina citri</i> | present                                                                                       |
| Honduras                     | <i>CLas</i>                | present (few occurrences)                                                              | -                       | -                                                                                             |
| Jamaica                      | <i>CLas</i>                | present (widespread)                                                                   | <i>Diaphorina citri</i> | present                                                                                       |
| Martinique                   | <i>CLas</i>                | restricted distribution                                                                | <i>Diaphorina citri</i> | present                                                                                       |
| Nicaragua                    | <i>CLas</i>                | present                                                                                | -                       | -                                                                                             |
| Puerto Rico                  | <i>CLas</i>                | present                                                                                | <i>Diaphorina citri</i> | present                                                                                       |
| United States Virgin Islands | <i>CLas</i>                | present (few occurrences)                                                              | <i>Diaphorina citri</i> | present                                                                                       |
| <b>South America</b>         |                            |                                                                                        |                         |                                                                                               |
| Brazil                       | <i>CLas</i><br><i>CLam</i> | present (Minas Gerais, Paraná, São Paulo)<br>present (Minas Gerais, Paraná, São Paulo) | <i>Diaphorina citri</i> | present (Amazonas, Bahia, Ceará, Pará, Pernambuco, Rio de Janeiro, Santa Catarina, São Paulo) |
| Columbia                     | <i>CLas</i>                | present (few occurrence)                                                               | <i>Diaphorina citri</i> | widespread                                                                                    |
| Paraguay                     | <i>CLas.</i>               | restricted distribution                                                                | <i>Diaphorina citri</i> | restricted distribution                                                                       |
| Uruguay                      | -                          | -                                                                                      | <i>Diaphorina citri</i> | few occurrences                                                                               |
| Venezuela                    | -                          | -                                                                                      | <i>Diaphorina citri</i> | restricted distribution                                                                       |
| <b>Europe</b>                |                            |                                                                                        |                         |                                                                                               |
| Portugal                     | -                          | -                                                                                      | <i>Trioza erytrae</i>   | restricted distribution                                                                       |
| Spain                        | -                          | -                                                                                      | <i>Trioza erytrae</i>   | restricted distribution                                                                       |
| <b>Oceania</b>               |                            |                                                                                        |                         |                                                                                               |
| American Samoa               | -                          | -                                                                                      | <i>Diaphorina citri</i> | present                                                                                       |
| Guam                         | -                          | -                                                                                      | <i>Diaphorina citri</i> | present                                                                                       |
| Papua New Guinea             | <i>CLas</i>                | restricted distribution                                                                | <i>Diaphorina citri</i> | restricted distribution                                                                       |

Leg.: *CLas*: *Candidatus Liberibacter asiaticus*; *CLaf*: *Candidatus Liberibacter africanus*; *CLam*: *Candidatus Liberibacter americanus*.

Ref. : CABI (2017), EPPO (2017).
